# Supplementary material for: Association Between Adverse Childhood Experiences and Mental Health among Nurses: A Propensity Score Matching Analysis
Source: Research Square preprint supplement (doi:10.21203/rs.3.rs-7364698/v1), 2025-09-18
Supplement: Supplementary file 1 [file 5efbe7cae4e1e322293ab918.docx]

**Supplementary Table 1 Binary logistics analysis of loneliness**

| Variable | *B* | *SE* | *Wald x2* | *P Value* | *OR (95% CI)* |
| --- | --- | --- | --- | --- | --- |
| Hospital | 0.002 | 0.000 | 32.834 | <0.001 | 1.002 (1.002-1.003) |
| Gender | -0.148 | 0.031 | 22.567 | <0.001 | 0.862 (0.811-0.917) |
| Years of working | -0.002 | 0.002 | 0.484 | 0.487 | 0.998 (0.994-1.003) |
| Professional title | 0.090 | 0.014 | 40.028 | <0.001 | 1.094 (1.064-1.125) |
| Administrative position | -0.097 | 0.041 | 5.713 | 0.017 | 0.907 (0.838-0.983) |
| Education | 0.103 | 0.022 | 20.969 | <0.001 | 1.108 (1.061-1.158) |
| Marital status | -0.255 | 0.019 | 186.678 | <0.001 | 0.775 (0.747-0.804) |
| Religion | 0.107 | 0.019 | 33.244 | <0.001 | 1.113 (1.073-1.154) |
| Nurse category | -0.065 | 0.038 | 2.948 | 0.086 | 0.937 (0.871-1.009) |
| Department | -0.001 | 0.002 | 0.107 | 0.744 | 0.999 (0.996-1.003) |
| Weekly working hours | 0.005 | 0.001 | 69.802 | <0.001 | 1.005 (1.004-1.006) |
| Pain | 0.728 | 0.027 | 717.619 | <0.001 | 2.072 (1.964-2.185) |
| Exercise | -0.145 | 0.010 | 219.673 | <0.001 | 0.865 (0.849-0.882) |
| Age | -0.018 | 0.003 | 44.280 | <0.001 | 0.982 (0.977-0.987) |
| ACE | 0.706 | 0.016 | 2062.599 | <0.001 | 2.026 (1.965-2.089) |

**Supplementary Table 2 Multiple linear regression analysis of anxiety symptoms**

| Variable | *B* | *SE* | *Beta* | *t* | *P* |
| --- | --- | --- | --- | --- | --- |
| Hospital | 0.002 | 0.001 | 0.011 | 3.586 | <0.001 |
| Gender | 0.102 | 0.047 | 0.007 | 2.188 | 0.029 |
| Years of working | 0.006 | 0.003 | 0.013 | 2.033 | 0.042 |
| Professional title | 0.302 | 0.020 | 0.067 | 15.066 | <0.001 |
| Administrative position | -0.205 | 0.055 | -0.013 | -3.717 | <0.001 |
| Education | 0.175 | 0.031 | 0.018 | 5.574 | <0.001 |
| Marital status | 0.058 | 0.026 | 0.008 | 2.245 | 0.025 |
| Religion | 0.241 | 0.027 | 0.026 | 8.775 | <0.001 |
| Nurse category | -0.135 | 0.051 | -0.009 | -2.637 | 0.008 |
| Department | -0.013 | 0.003 | -0.015 | -4.902 | <0.001 |
| Weekly working hours | 0.012 | 0.001 | 0.043 | 14.546 | <0.001 |
| Pain | 2.152 | 0.044 | 0.147 | 49.227 | <0.001 |
| Exercise frequency | -0.295 | 0.013 | -0.067 | -22.122 | <0.001 |
| Age | -0.023 | 0.004 | -0.045 | -6.088 | <0.001 |
| ACE | 1.288 | 0.022 | 0.175 | 59.145 | <0.001 |

**Supplementary Table 3 Multiple linear regression analysis of depressive symptoms**

| Variable | *B* | *SE* | *Beta* | *t* | *P* |
| --- | --- | --- | --- | --- | --- |
| Hospital | 0.003 | 0.001 | 0.011 | 3.808 | <0.001 |
| Gender | -0.070 | 0.054 | -0.004 | -1.289 | 0.197 |
| Years of working | 0.011 | 0.003 | 0.021 | 3.256 | 0.001 |
| Professional title | 0.370 | 0.023 | 0.070 | 15.800 | <0.001 |
| Administrative position | -0.682 | 0.064 | -0.037 | -10.602 | <0.001 |
| Education | 0.149 | 0.037 | 0.013 | 4.055 | <0.001 |
| Marital status | -0.085 | 0.030 | -0.010 | -2.801 | 0.005 |
| Religion | 0.317 | 0.032 | 0.029 | 9.894 | <0.001 |
| Nurse category | -0.433 | 0.060 | -0.024 | -7.233 | <0.001 |
| Department | -0.010 | 0.003 | -0.009 | -3.088 | 0.002 |
| Weekly working hours | 0.017 | 0.001 | 0.053 | 17.814 | <0.001 |
| Pain | 2.668 | 0.051 | 0.155 | 52.273 | <0.001 |
| Exercise frequency | -0.443 | 0.016 | -0.085 | -28.405 | <0.001 |
| Age | -0.029 | 0.004 | -0.049 | -6.768 | <0.001 |
| ACE | 1.600 | 0.025 | 0.186 | 62.935 | <0.001 |

**Supplementary Table 4 Multiple linear regression analysis of perceived stress**

| Variable | *B* | *SE* | *Beta* | *t* | *P* |
| --- | --- | --- | --- | --- | --- |
| Hospital | -0.001 | 0.000 | -0.013 | -4.185 | <0.001 |
| Gender | 0.271 | 0.027 | 0.031 | 9.962 | <0.001 |
| Years of working | 0.012 | 0.002 | 0.045 | 6.662 | <0.001 |
| Professional title | 0.210 | 0.012 | 0.082 | 17.958 | <0.001 |
| Administrative position | 0.207 | 0.032 | 0.023 | 6.453 | <0.001 |
| Education | 0.226 | 0.018 | 0.040 | 12.321 | <0.001 |
| Marital status | -0.001 | 0.015 | 0.000 | -.073 | 0.941 |
| Religion | 0.062 | 0.016 | 0.012 | 3.867 | <0.001 |
| Nurse category | 0.087 | 0.030 | 0.010 | 2.905 | 0.004 |
| Department | -0.007 | 0.002 | -0.014 | -4.430 | <0.001 |
| Weekly working hours | 0.009 | 0.000 | 0.054 | 17.595 | <0.001 |
| Pain | 0.350 | 0.025 | 0.042 | 13.768 | <0.001 |
| Exercise frequency | 0.110 | 0.008 | 0.044 | 14.151 | <0.001 |
| Age | -0.023 | 0.002 | -0.081 | -10.813 | <0.001 |
| ACE | -0.301 | 0.013 | -0.072 | -23.724 | <0.001 |

**Supplementary Table 5 Multiple linear regression analysis of obsessive symptoms**

| Variable | *B* | *SE* | *Beta* | *t* | *P* |
| --- | --- | --- | --- | --- | --- |
| Hospital | 0.002 | 0.001 | 0.010 | 3.475 | 0.001 |
| Gender | -0.565 | 0.043 | -0.040 | -13.038 | <0.001 |
| Years of working | -0.014 | 0.003 | -0.035 | -5.204 | <0.001 |
| Professional title | 0.148 | 0.019 | 0.036 | 7.961 | <0.001 |
| Administrative position | -0.443 | 0.051 | -0.030 | -8.645 | <0.001 |
| Education | -0.011 | 0.029 | -0.001 | -.390 | 0.696 |
| Marital status | 0.063 | 0.024 | 0.010 | 2.637 | 0.008 |
| Religion | 0.212 | 0.025 | 0.025 | 8.331 | <0.001 |
| Nurse category | -0.420 | 0.048 | -0.029 | -8.812 | <0.001 |
| Department | -0.003 | 0.002 | -0.003 | -1.081 | 0.280 |
| Weekly working hours | 0.008 | 0.001 | 0.030 | 10.024 | <0.001 |
| Pain | 1.651 | 0.041 | 0.123 | 40.659 | <0.001 |
| Exercise frequency | -0.122 | 0.012 | -0.030 | -9.815 | <0.001 |
| Age | -0.024 | 0.003 | -0.051 | -6.913 | <0.001 |
| ACE | 1.003 | 0.020 | 0.148 | 49.570 | <0.001 |
